# Supplementary material for: Soil microbial diversity impacts plant microbiota more than herbivory
Source: bioRxiv or medRxiv preprint supplement (doi:10.1101/2020.09.30.320317), 2021-04-26
Supplement: Supplementary file [file media-1.pdf]

# Soil microbial diversity impacts plant and herbivore microbiomes more than herbivory

Antonino Malacrinò, Alison J. Karley, Leonardo Schena, Alison E. Bennett

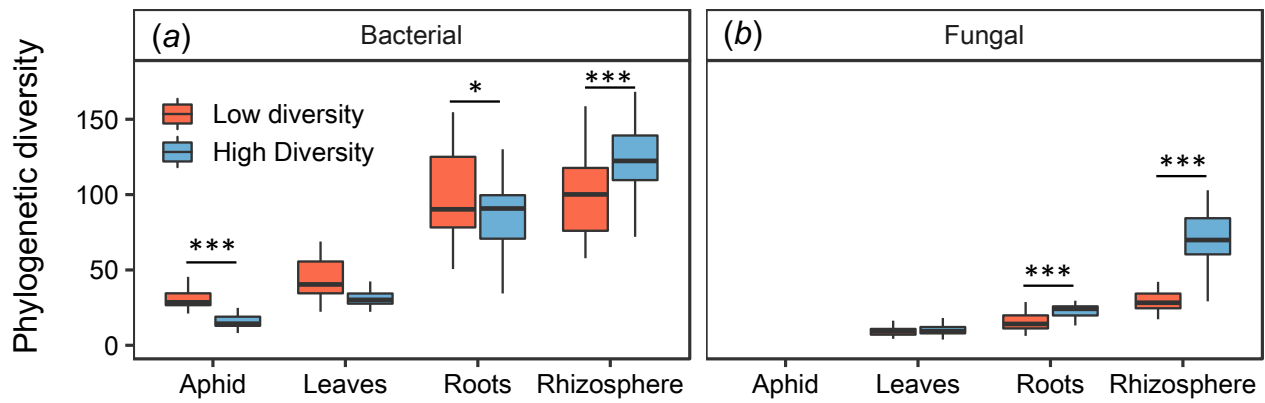

**Figure S1.** Phylogenetic diversity of (a) bacterial and (b) fungal communities in each compartment in response to soil microbial diversity. \*\*\*  $P < 0.001$ ; \*  $P < 0.05$
