# Supplementary material for: Soil microbial diversity impacts plant microbiota more than herbivory
Source: bioRxiv or medRxiv preprint supplement (doi:10.1101/2020.09.30.320317), 2021-04-26
Supplement: Supplementary file [file media-5.pdf]

## Soil microbial diversity impacts plant and herbivore microbiomes more than herbivory

Antonino Malacrinò, Alison J. Karley, Leonardo Schena, Alison E. Bennett

**Table S2.** Specific contrasts (*Control – Infested*) extracted from the linear mixed-effects model to analyse, for each soil treatment, the effect of herbivory on bacterial and fungal diversity for each compartment.

| Compartment | Soil treatment | Bacterial     |                  | Fungal        |                  |
|-------------|----------------|---------------|------------------|---------------|------------------|
|             |                | Estimate      | P                | Estimate      | P                |
| Leaves      | Low diversity  | <b>-16.32</b> | <b>0.04</b>      | -2.96         | 0.31             |
|             | High diversity | 2.34          | 0.75             | -1.74         | 0.56             |
| Roots       | Low diversity  | <b>-34.01</b> | <b>&lt;0.001</b> | <b>-6.40</b>  | <b>0.03</b>      |
|             | High diversity | <b>-36.67</b> | <b>&lt;0.001</b> | <b>-7.05</b>  | <b>0.02</b>      |
| Rhizosphere | Low diversity  | -14.93        | 0.05             | <b>-6.73</b>  | <b>0.02</b>      |
|             | High diversity | <b>-32.98</b> | <b>&lt;0.001</b> | <b>-24.20</b> | <b>&lt;0.001</b> |
