# Supplementary material for: Soil microbial diversity impacts plant microbiota more than herbivory
Source: bioRxiv or medRxiv preprint supplement (doi:10.1101/2020.09.30.320317), 2021-04-26
Supplement: Supplementary file [file media-6.pdf]

# Soil microbial diversity impacts plant and herbivore microbiomes more than herbivory

Antonino Malacrinò, Alison J. Karley, Leonardo Schena, Alison E. Bennett

**Table S3.** Specific contrasts (*S. vernei* / *S. tuberosum*) extracted from the PERMANOVA model to analyse, for each soil treatment, the effect of plant species on the bacterial and fungal community structure for each compartment.

| Compartment | Soil treatment | Bacterial ( <i>P</i> value) | Fungal ( <i>P</i> value) |
|-------------|----------------|-----------------------------|--------------------------|
| Leaves      | Low diversity  | <b>0.04</b>                 | <b>0.02</b>              |
|             | High diversity | 0.06                        | 0.10                     |
| Roots       | Low diversity  | <b>0.001</b>                | <b>0.001</b>             |
|             | High diversity | 0.22                        | <b>0.002</b>             |
| Rhizosphere | Low diversity  | <b>0.001</b>                | <b>0.001</b>             |
|             | High diversity | 0.3                         | 0.05                     |
