# Supplementary material for: Soil microbial diversity impacts plant microbiota more than herbivory
Source: bioRxiv or medRxiv preprint supplement (doi:10.1101/2020.09.30.320317), 2021-04-26
Supplement: Supplementary file [file media-7.pdf]

# Soil microbial diversity impacts plant and herbivore microbiomes more than herbivory

Antonino Malacrinò, Alison J. Karley, Leonardo Schena, Alison E. Bennett

**Table S4.** Specific contrasts (*Low diversity / High diversity*) extracted from the PERMANOVA model to analyse, for each plant species, the effect of soil treatment on the bacterial and fungal community structure for each compartment.

| <b>Compartment</b> | <b>Soil treatment</b> | <b>Bacterial (<i>P</i> value)</b> | <b>Fungal (<i>P</i> value)</b> |
|--------------------|-----------------------|-----------------------------------|--------------------------------|
| Leaves             | <i>S. tuberosum</i>   | 0.07                              | 0.10                           |
|                    | <i>S. vernei</i>      | <b>0.01</b>                       | 0.29                           |
| Roots              | <i>S. tuberosum</i>   | <b>0.001</b>                      | <b>0.001</b>                   |
|                    | <i>S. vernei</i>      | <b>0.001</b>                      | <b>0.001</b>                   |
| Rhizosphere        | <i>S. tuberosum</i>   | <b>0.001</b>                      | <b>0.001</b>                   |
|                    | <i>S. vernei</i>      | <b>0.001</b>                      | <b>0.001</b>                   |
